# Supplementary material
Source: PubMed Central journal article supplement (PMC7861027)
Supplement: 00741-2020.SUPPLEMENT.pdf [file 00741-2020.SUPPLEMENT.pdf]

**Supplementary Table 1.** Correlation of HBP levels with cytokines and pulmonary function

|                                     | HBP   |         |
|-------------------------------------|-------|---------|
|                                     | r     | P-Value |
| <b><i>Inflammation</i></b>          |       |         |
| IL-2                                | 0.22  | 0.310   |
| IL-4                                | 0.17  | 0.442   |
| IL-6                                | 0.69  | 0.000   |
| IL-10                               | 0.70  | 0.000   |
| TNF-a                               | 0.27  | 0.214   |
| IFN-r                               | 0.01  | 0.964   |
| PCT                                 | 0.71  | 0.001   |
| CRP                                 | 0.39  | 0.005   |
| <b><i>Pulmonary ventilation</i></b> |       |         |
| PH                                  | -0.03 | 0.718   |
| PaCO2                               | -0.03 | 0.744   |
| PaO2                                | -0.09 | 0.279   |
| SaO2                                | -0.04 | 0.657   |
| PA-aO2                              | 0.27  | 0.001   |
| Qsp                                 | 0.20  | 0.010   |
| ABE                                 | -0.04 | 0.628   |
| SBE                                 | -0.04 | 0.582   |
| Spiro-index                         | 0.31  | 0.001   |
| OI                                  | -0.28 | 0.001   |

**Supplementary Table 2.** Blood clotting index analysis in the clinical stable and aggravation periods

|            | Clinical Stable period   | &HBP P | Aggravation period       | &HBP P | *Difference | *P     |
|------------|--------------------------|--------|--------------------------|--------|-------------|--------|
| PT         | 14.60(14.20, 15.10)      | 0.333  | 15.00(14.40, 15.60)      | 0.022  | 0.40        | 0.134  |
| PA         | 83.00(76.00, 88.00)      | 0.251  | 78.00(72.00, 85.00)      | 0.021  | -5.00       | 0.145  |
| Fibrinogen | 2.98(2.44, 4.05)         | 0.438  | 2.50(2.04, 3.30)         | 0.849  | -0.48       | 0.338  |
| APTT       | 45.50(40.40, 49.80)      | 0.025  | 48.17(41.70, 54.80)      | 0.036  | 0.40        | 0.036  |
| TT         | 17.60(16.70, 19.50)      | 0.675  | 17.50(16.60, 19.30)      | 0.407  | -0.10       | 0.946  |
| D-Dimer    | 2439.00(791.00, 6667.00) | 0.025  | 4682.00(604.50, 5988.00) | 0.017  | 2243.00     | <0.001 |

PT: Prothrombin time; PA: Prothrombin activity; APTT: Activated partial thromboplastin time; TT: Thrombin time; &HBP: HBP relative to the left-hand column; \*comparison of SARS-CoV-2 infection in remission-vs-recurrence.

**Supplementary Table 3.** Myocardial index in the clinical stable and aggravation periods

|       | Clinical Stable period | &HBP P | Aggravation Recurrence | &HBP P | *Difference | *P     |
|-------|------------------------|--------|------------------------|--------|-------------|--------|
| AST   | 38.50(29.13, 51.68)    | 0.024  | 49.25(37.55, 65.53)    | 0.031  | 10.75       | <0.001 |
| CK    | 53.00(33.85, 80.70)    | 0.046  | 98.15(22.83, 214.90)   | 0.007  | 45.15       | <0.001 |
| CK-MB | 7.00(6.00, 9.00)       | 0.409  | 8.50(5.00, 10.00)      | 0.361  | 0.5         | 0.027  |
| cTnI  | 0.02(0.01, 0.06)       | 0.017  | 0.05(0.02, 0.07)       | 0.024  | 0.03        | 0.029  |
| Mb    | 69.45(42.63, 158.10)   | 0.031  | 186.30(125.90, 312.20) | 0.004  | 116.85      | <0.001 |

AST: Aspartate Aminotransferase; CK: Creatine kinase; CK-MB: Creatine kinase isoenzymes; cTnI: cardiac troponin I; Mb: myoglobin. &HBP: HBP compared to the left-hand column. \* comparison of SARS-CoV-2 infection in remission-vs-at recurrence.

**Supplementary Table 4** Renal function test index

|                | Clinical Stable period | &HBP P | Aggravation Recurrence | &HBP P | *Difference | *P     |
|----------------|------------------------|--------|------------------------|--------|-------------|--------|
| BUN            | 10.45(7.38, 13.93)     | <0.001 | 11.60(8.35, 12.25)     | 0.006  | 1.15        | <0.001 |
| Cr             | 76.50(48.68, 99.35)    | 0.034  | 90.15(54.55, 146.40)   | 0.015  | 13.65       | <0.001 |
| K <sup>+</sup> | 4.14(3.88, 4.54)       | 0.902  | 4.19(4.02, 4.38)       | 0.712  | 0.05        | 0.884  |

BUN: Blood urea nitrogen.

**Supplementary Table 5** The nucleic acid test results in the severe COVID-19 patients\*

| Admission Days      | Time, 5                | 10                 | 15                        | 20                      | 25                   | 30                  | 35                   | 40                           | 45                                          | 50                               |   |
|---------------------|------------------------|--------------------|---------------------------|-------------------------|----------------------|---------------------|----------------------|------------------------------|---------------------------------------------|----------------------------------|---|
| Throat Swab         | 6[67%], 0, 3[33%]      | 10[77%], 0, 4[33%] | 9[38%], 1[4%], 14[58%]    | 6[67%], 0, 0, 0, 3[33%] | 1[100%]              | 0                   | 0                    | 0                            | 0                                           | 0                                |   |
| Nose Swab           | 5[83%], 0, 1[17%]      | 4[80%], 0, 1[20%]  | 3[38%], 0, 5[62%]         | 2[100%], 0, 0           | 1[100%], 0, 0        | 0, 0, 0, 0, 1[100%] | 0, 0, 0, 0, 1[100%]  | 0, 0, 0, 0, 23[56%], 20[59%] | 0, 0, 0, 0, 0                               | 0, 0, 0, 0, 12[29%]              | 0 |
| Nasopharyngeal Swab | 1[14%], 2[29%]         | 1[10%], 4[40%]     | 5[24%], 5[76%]            | 0, 8[73%], 3[27%]       | 0, 4[57%], 3[43%], 0 | 1[2%], 17[42%]      | 2[6%], 12[56%]       | 20[77%], 6[23%]              | 0, 14[78%], 4[22%]                          | 0, 6[15%], 23[56%]               |   |
| Tears Swab          | 5[100%], 0             | 0, 2[100%]         | 0, 1[33%], 1[33%], 2[33%] | 0, 1[100%]              | 0, 0, 0, 1[100%], 0  | 0, 2[100%]          | 0, 0, 0, 0, 2[100%]  | 0, 0, 0, 0, 3[100%]          | 0, 0, 0, 0, 0                               | 0, 0, 0, 2[100%]                 |   |
| Crissum             | 0, 3[100%]             | 0, 1[100%]         | 0, 1[17%], 3[50%]         | 0, 2[100%]              | 0, 1[14%], 4[57%]    | 1[10%], 11[58%]     | 5[45%], 6[55%]       | 0, 4[44%], 5[56%]            | 0, 4[80%], 1[20%]                           | 0, 3[25%], 9[75%]                |   |
| Phlegm Deep Phlegm  | 13[87%], 2[13%]        | 0, 3[16%]          | 0, 3[16%], 13[32%], 3[7%] | 17[74%], 0, 6[26%]      | 0, 1[20%], 2[40%]    | 2[11%], 10[56%]     | 6[43%], 8[57%]       | 0, 5[33%], 10[67%]           | 0, 1[11%], 6[67%]                           | 2[8%], 1[4%], 23[88%]            |   |
| Plasma              | 2[100%], 0             | 2[100%], 0         | 3[75%], 0, 1[15%]         | 1[100%], 0              | 0, 0, 1[100%]        | 3[100%]             | 1[100%]              | 3[100%]                      | 2[100%]                                     | 0, 0, 3[100%]                    |   |
| Gastric Juice       | 3[50%], 2[33%], 1[17%] | 1[14%], 6[86%]     | 0, 0, 2[100%]             | 0, 1[17%], 5[83%]       | 0, 0, 3[100%]        | 0, 2[50%], 2[50%]   | 0, 1[100%]           | 0, 1[33%], 1[33%]            | 0, 1[33%], 5[71%], 2[29%]                   | 0, 3[30%], 7[70%]                |   |
| Urine               | 3[43%], 4[57%]         | 0, 1[14%], 6[86%]  | 0, 3[33%], 6[67%]         | 0, 1[50%], 1[50%]       | 0, 1[100%], 0        | 0, 1[33%], 2[67%]   | 0, 1[50%], 1[50%]    | 0, 0                         | 0, 0                                        | 0, 0                             |   |
| Feces               | 1[10%], 9[90%]         | 0, 4[100%]         | 0, 2[33%], 4[67%]         | 0, 0, 1[100%]           | 0, 0, 1[100%]        | 0, 0, 1[100%]       | 0, 0, 7[70%], 4[57%] | 0, 7[54%]                    | 0, 2[20%], 0, 0, 0, 0, 0, 0, 3[30%], 7[70%] | 0, 0, 0, 0, 0, 0, 3[30%], 7[70%] |   |

\* N[%]: RNA test, Positive/Suspicious positive/Negative
