# Supplementary material
Source: PubMed Central journal article supplement (PMC7861027)

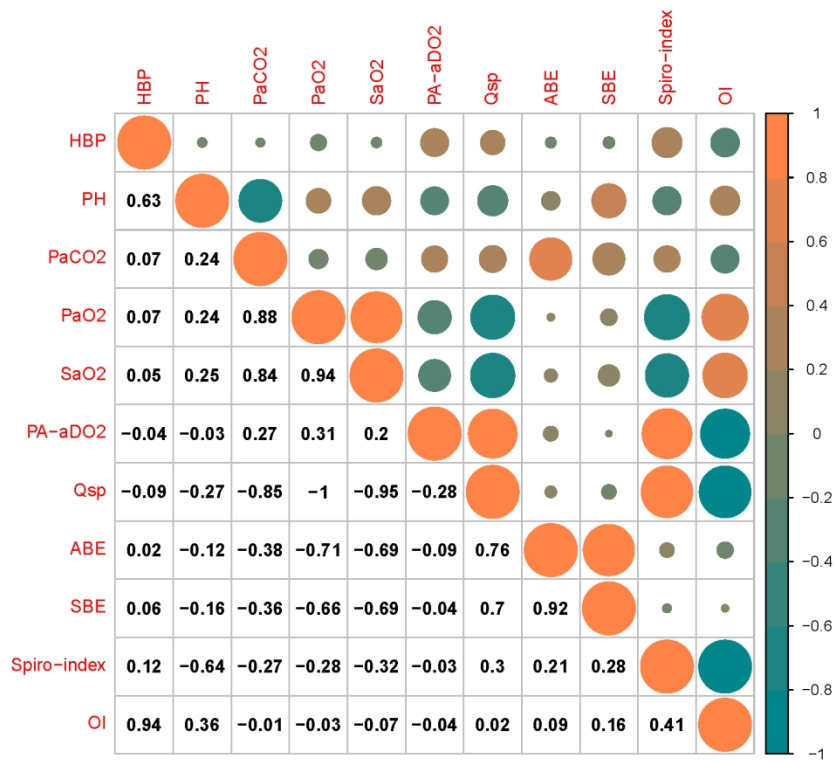

215x279mm (200 x 200 DPI)

Supplement: 00741-2020.supplementary_figure_S2.pdf [file 00741-2020.supplementary_figure_S2.pdf]

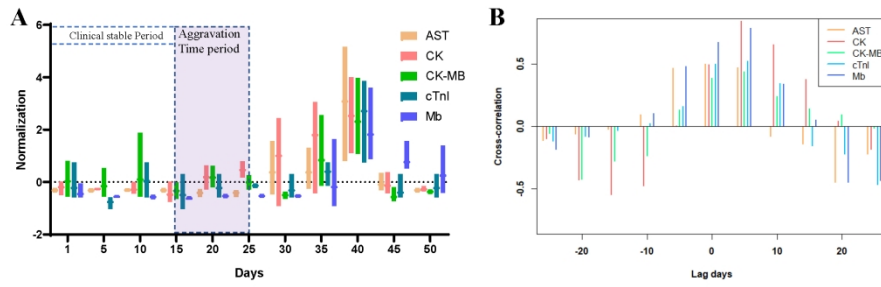

338x190mm (200 x 200 DPI)

Supplement: 00741-2020.supplementary_figure_S3.pdf [file 00741-2020.supplementary_figure_S3.pdf]

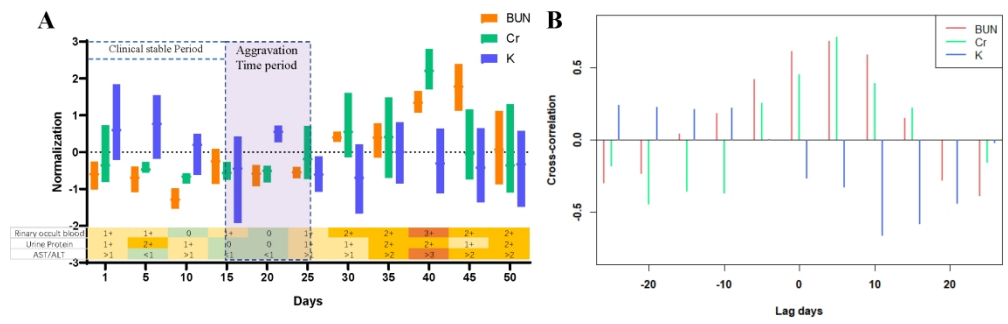

338x190mm (200 x 200 DPI)

Supplement: 00741-2020.supplementary_figure_S4.pdf [file 00741-2020.supplementary_figure_S4.pdf]
